# Supplementary material
Source: MDPI journal article supplement (https://www.mdpi.com/2072-4292/15/2/507)
Supplement: s1 [file s1]

## Supporting Information

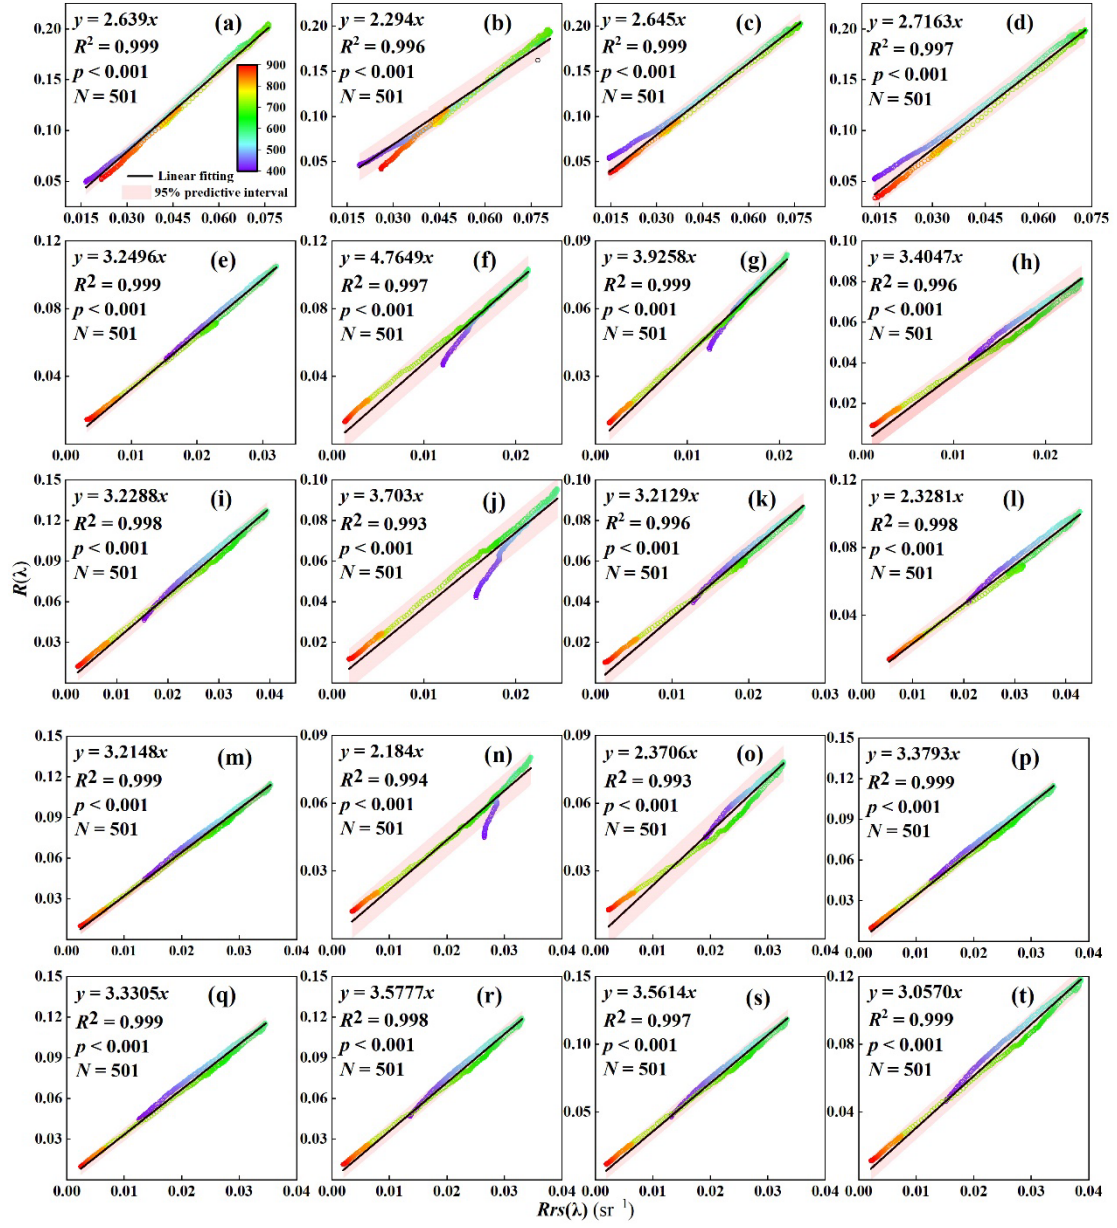

**Figure S1.** The relationship between  $R(\lambda)$  and corresponding  $Rrs(\lambda)$  from 400 to 900 nm under overcast (a-e), cloud (f-i) and sunny (m-t).

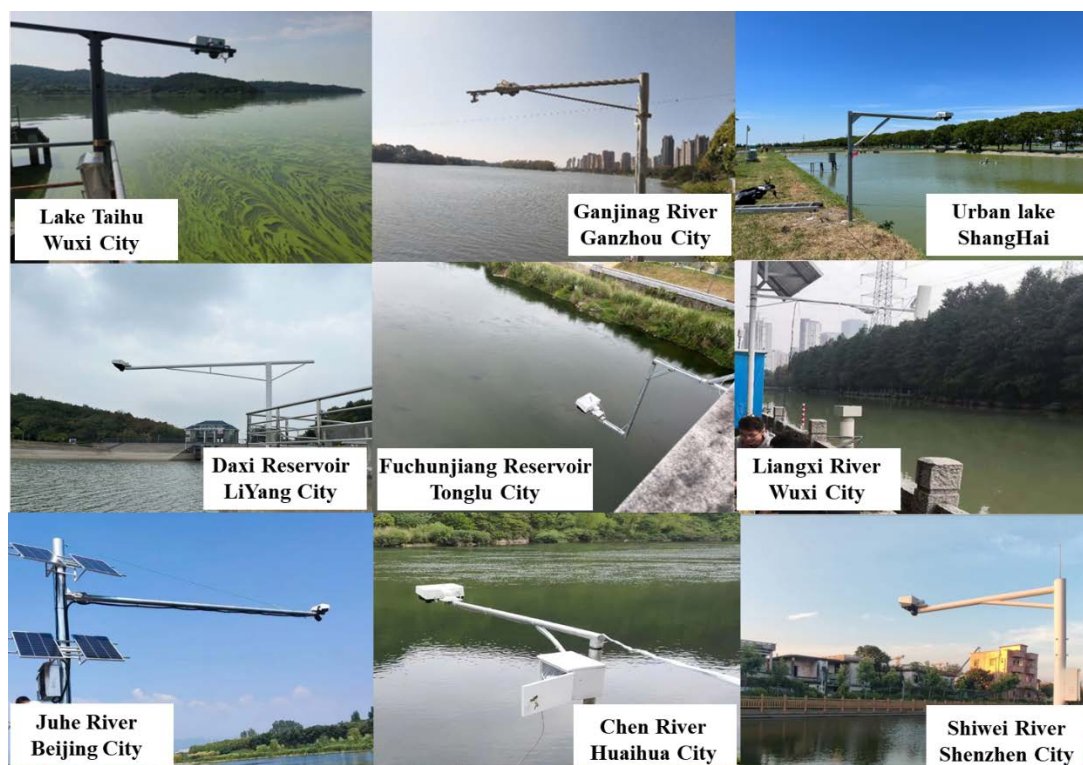

**Figure S2.** The application of GHPs in different water bodies including Lake Taihu (a), Ganjiang River (b), an urban lake in shanghai (c), Daxi Reservoir (d), Fuchunjiang Reservoir (e), Liangxi River (f), Juhe River (g), Chenhe River (h) and Shiwei River (i).
